# Supplementary material for: Identification of Gene Associated with Sweetness in Corn (Zea mays L.) by Genome-Wide Association Study (GWAS) and Development of a Functional SNP Marker for Predicting Sweet Corn
Source: MDPI journal article supplement (doi:10.3390/plants10061239), 2021-06-18
Supplement: s1 [file s1]

A.

$$\Delta K = m(|L''(K)|) / s(L(K))$$

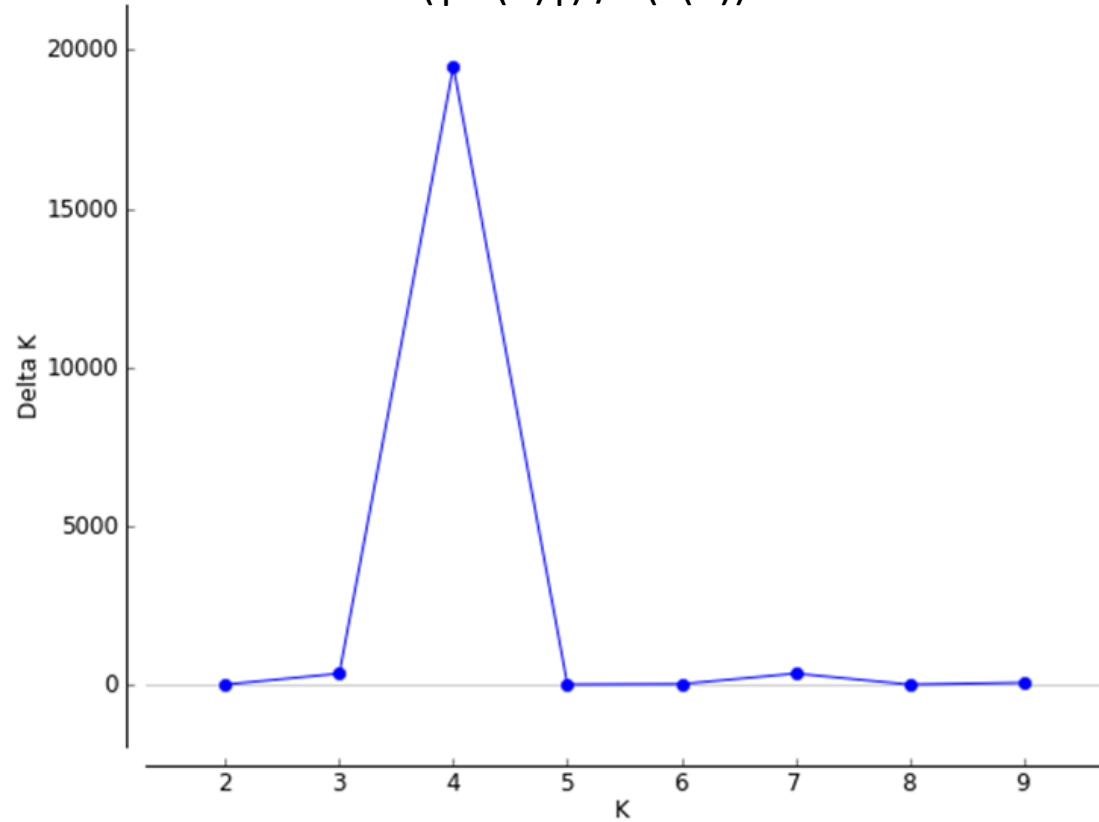

B.

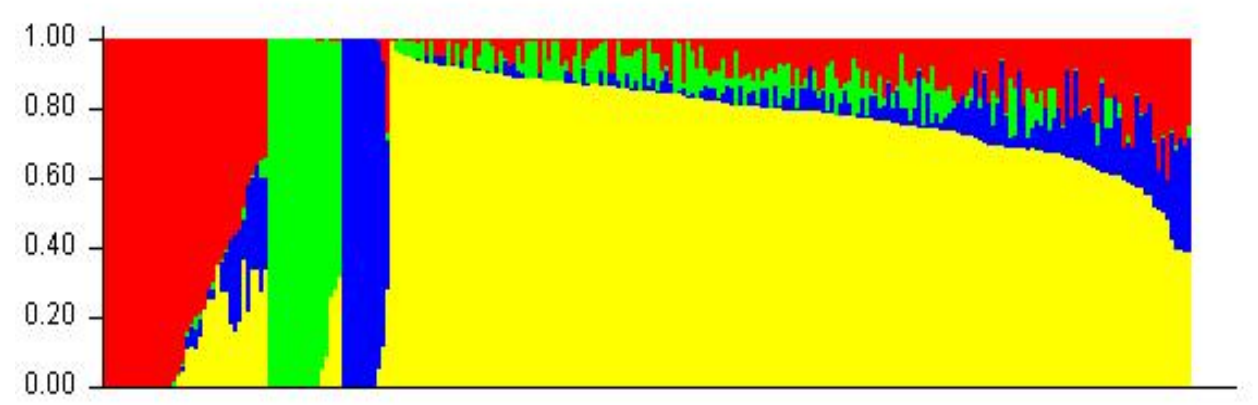

**Figure S4.** The subpopulations of the 250 maize lines. A. Best delta K estimation by Evanno method; Delta K ( $\Delta K$ ) =  $m(|L''(K)|)/s[L(K)]$ , where  $m$  = means of the absolute values of  $L''(K)$ , divided by the standard deviation of  $L(K)$ . B. Estimated population structure of 250 tropical adapted maize recombinant inbred lines as revealed by 19,565 SNP markers for  $K = 4$ .
