# Supplementary material for: Identification of Gene Associated with Sweetness in Corn (Zea mays L.) by Genome-Wide Association Study (GWAS) and Development of a Functional SNP Marker for Predicting Sweet Corn
Source: MDPI journal article supplement (doi:10.3390/plants10061239), 2021-06-18
Supplement: s1 [file s1]

A.

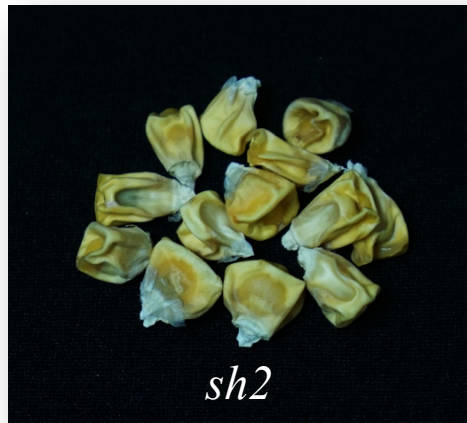

B.

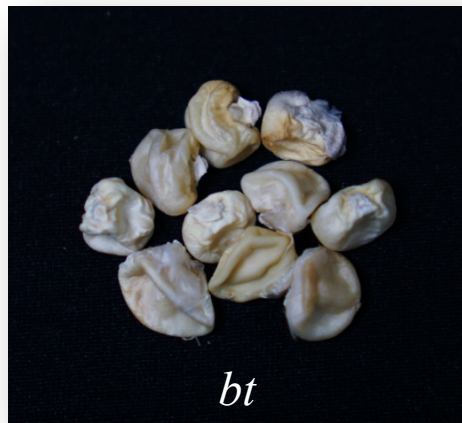

C.

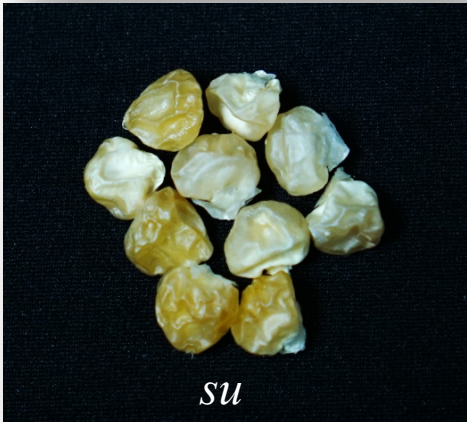

D.

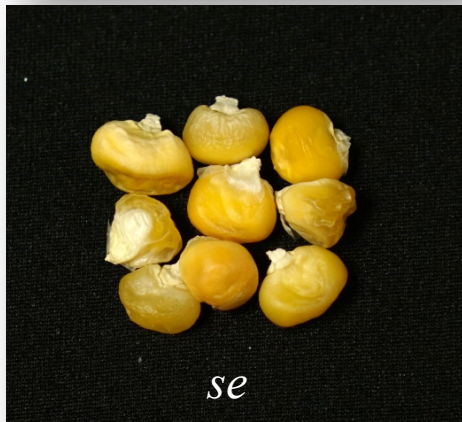

E.

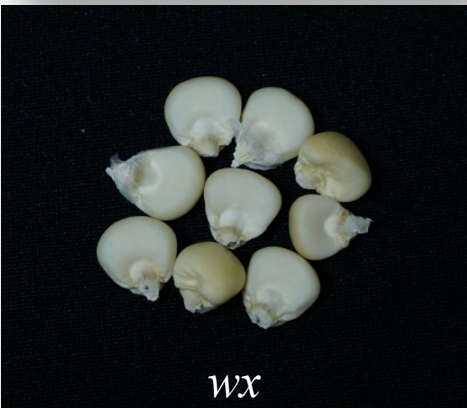

F.

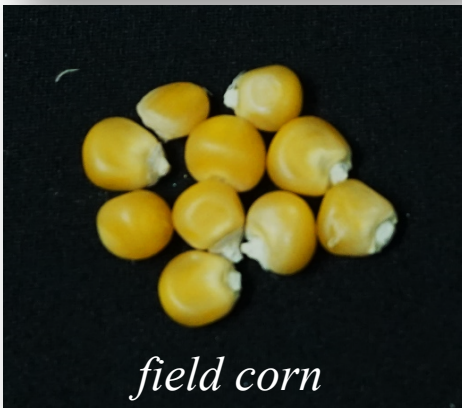

**Figure S1.** The physical appearance of dried kernels of sweet, waxy and field corns. (A)-(D) represent sweet corn with the background *sh2*, *bt*, *su* and *se*, respectively. (E) and (F) represent waxy corn and field corn (common corn), respectively.
