# Supplementary material for: Identification of Gene Associated with Sweetness in Corn (Zea mays L.) by Genome-Wide Association Study (GWAS) and Development of a Functional SNP Marker for Predicting Sweet Corn
Source: MDPI journal article supplement (doi:10.3390/plants10061239), 2021-06-18
Supplement: s1 [file s1]

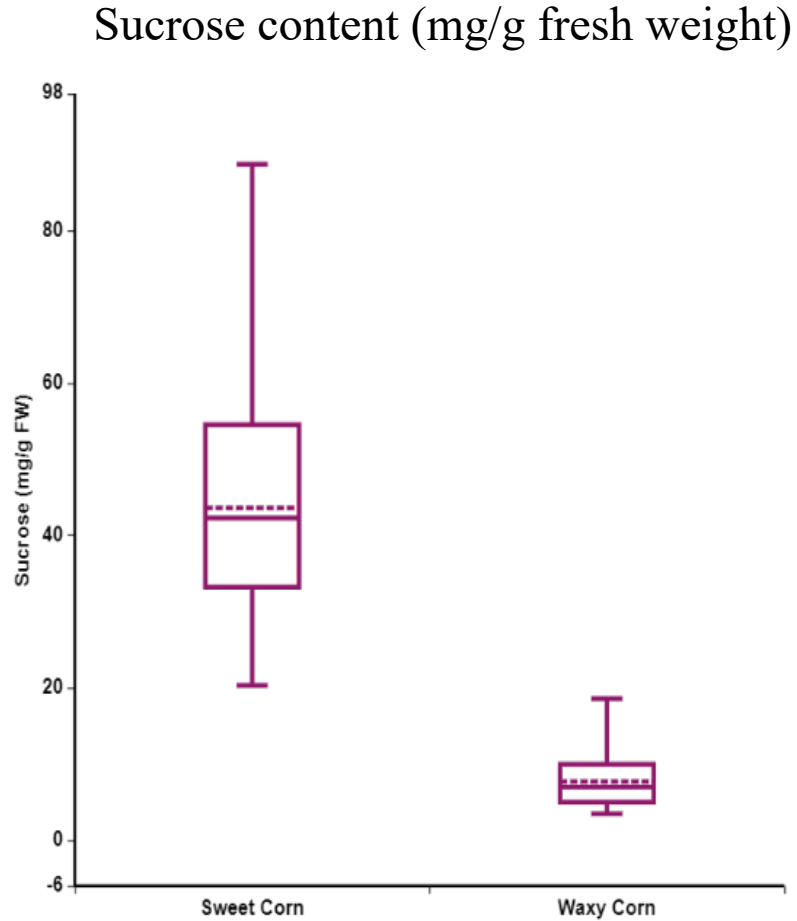

Sucrose content (mg/g fresh weight)

|            | Sweet corn (n=86)   | Waxy corn (n=164)  |
|------------|---------------------|--------------------|
| min        | 20.334              | 3.468              |
| max        | 88.719              | 18.595             |
| mean       | 43.617 <sup>a</sup> | 7.701 <sup>b</sup> |
| % CV       | 43.235              |                    |
| LSD (0.05) | 24.122              |                    |

**Figure S2.** Boxplots and statistical test of sucrose content comparing sweet corn and waxy corn groups in panel of 250 lines. Comparison of means was conducted with least significant difference (LSD) test ( $p < 0.05$ ) using Agricolae R package.
