# Supplementary material for: Identification of Gene Associated with Sweetness in Corn (Zea mays L.) by Genome-Wide Association Study (GWAS) and Development of a Functional SNP Marker for Predicting Sweet Corn
Source: Plants (Basel). 2021 Jun 18;10(6):1239. doi: 10.3390/plants10061239 (PMC8235792; doi:10.3390/plants10061239)
Supplement: Supplementary file 1 [file plants-10-01239-s001.zip]

Archive with 18 entries (18 files):
- Figure S1 - Corn Kenel structure .pdf
- __MACOSX/._Figure S1 - Corn Kenel structure .pdf
- Figure S2 - Boxplots and stats of sucrose content.pdf
- __MACOSX/._Figure S2 - Boxplots and stats of sucrose content.pdf
- Figure S3 - SNP density.pdf
- __MACOSX/._Figure S3 - SNP density.pdf
- Figure S4 - STRUCTURE.pdf
- __MACOSX/._Figure S4 - STRUCTURE.pdf
- Table S1 - List of 250 corn lines for GWAS_final_with kernel phenotype.xlsx
- __MACOSX/._Table S1 - List of 250 corn lines for GWAS_final_with kernel phenotype.xlsx
- Table S2 - List of 81 corn lines for marker validation.xlsx
- __MACOSX/._Table S2 - List of 81 corn lines for marker validation.xlsx
- Table S3 - List of associated SNP annotation_final.xlsx
- __MACOSX/._Table S3 - List of associated SNP annotation_final.xlsx
- Table S4 - a set of 43 maize lines using a MassARRAY┬« platform .xlsx
- __MACOSX/._Table S4 - a set of 43 maize lines using a MassARRAY┬« platform .xlsx
- Table S5 - Marker validation.xlsx
- __MACOSX/._Table S5 - Marker validation.xlsx
