# Supplementary material for: Identification of Gene Associated with Sweetness in Corn (Zea mays L.) by Genome-Wide Association Study (GWAS) and Development of a Functional SNP Marker for Predicting Sweet Corn
Source: Plants (Basel). 2021 Jun 18;10(6):1239. doi: 10.3390/plants10061239 (PMC8235792; doi:10.3390/plants10061239)
Supplement: Supplementary file 1 [file plants-10-01239-s001.zip › Table S1 - List of 250 corn lines for GWAS_final_with kernel phenotype.xlsx]

## Sheet: Sheet1
Table S1. List of 250 inbreds and recombinant inbred lines used for GWAS analysis in this study.
No	Sample name	Inbred/line/RIL	Sources	%Heterozygosity	Sucrose content (mg/g fresh weight)	Kernel phenotype	Classification
1	101L	Inbred	KKU	5.242	23.4276	Shrunken, Opaque to tarnished	sweet corn
2	TSC/H3	Inbred	KKU	6.306	36.3586	Shrunken, Opaque to translucent	sweet corn
3	KV	Inbred	KKU	5.77	8.36495	Opaque	waxy corn
4	No.10	Inbred	KKU	7.537	38.6738	Shrunken, Opaque to tarnished	sweet corn
5	KNM	Inbred	KKU	3.639	8.43398	Opaque	waxy corn
6	No.4	Inbred	KKU	8.759	54.7424	Shrunken, Opaque to tarnished	sweet corn
7	No.8	Inbred	KKU	6.947	49.5603	Shrunken, Opaque to tarnished	sweet corn
8	CNSiA 17005	RIL	CNFRC	2.492	39.3315	Shrunken, Opaque to translucent	sweet corn
9	CNSiA 17016	RIL	CNFRC	3.241	20.3341	Shrunken, Opaque to translucent	sweet corn
10	CNSiA 17040	RIL	CNFRC	2.504	33.3136	Shrunken, Opaque to translucent	sweet corn
11	CNSiA 17055	RIL	CNFRC	2.293	75.0884	Shrunken, Opaque to translucent	sweet corn
12	CNSiA 17074	RIL	CNFRC	2.35	54.5198	Shrunken, Opaque to translucent	sweet corn
13	CNSiA 17096	RIL	CNFRC	2.596	24.3037	Shrunken, Opaque to translucent	sweet corn
14	CNSiA 17130	RIL	CNFRC	3.168	59.7037	Shrunken, Opaque to translucent	sweet corn
15	CNSiA 17140	RIL	CNFRC	16.343	44.217	Shrunken, Opaque to translucent	sweet corn
16	CNSiA 17164	RIL	CNFRC	3.186	43.4269	Shrunken, Opaque to translucent	sweet corn
17	CNSiA 17241	RIL	CNFRC	2.611	50.0566	Shrunken, Opaque to translucent	sweet corn
18	CNSiA 17242	RIL	CNFRC	2.68	55.0504	Shrunken, Opaque to translucent	sweet corn
19	CNSiA 17244	RIL	CNFRC	3.165	33.3796	Shrunken, Opaque to translucent	sweet corn
20	CNSiB 17075	RIL	CNFRC	2.563	40.1637	Shrunken, Opaque to translucent	sweet corn
21	CNSiB 17088	RIL	CNFRC	4.383	52.1264	Shrunken, Opaque to translucent	sweet corn
22	CNSiB 17173	RIL	CNFRC	2.595	31.1178	Shrunken, Opaque to translucent	sweet corn
23	CNSiB 17220	RIL	CNFRC	2.76	36.7487	Shrunken, Opaque to translucent	sweet corn
24	CNSiB 17248	RIL	CNFRC	2.269	60.2662	Shrunken, Opaque to translucent	sweet corn
25	CNSiE 17005	RIL	CNFRC	3.439	75.967	Shrunken, Opaque to translucent	sweet corn
26	CNSiE 17006	RIL	CNFRC	3.165	88.7185	Shrunken, Opaque to translucent	sweet corn
27	CNSiE 17031	RIL	CNFRC	15.684	31.2761	Shrunken, Opaque to translucent	sweet corn
28	CNSiE 17048	RIL	CNFRC	5.937	34.5694	Shrunken, Opaque to translucent	sweet corn
29	CNSiE 17052	RIL	CNFRC	4.534	43.687	Shrunken, Opaque to translucent	sweet corn
30	CNSiE 17057	RIL	CNFRC	7.32	51.1286	Shrunken, Opaque to translucent	sweet corn
31	CNSiE 17074	RIL	CNFRC	4.203	66.2989	Shrunken, Opaque to translucent	sweet corn
32	CNSiE 17085	RIL	CNFRC	4.564	36.8914	Shrunken, Opaque to translucent	sweet corn
33	CNSiE 17094	RIL	CNFRC	3.261	26.1738	Shrunken, Opaque to translucent	sweet corn
34	CNSiE 17100	RIL	CNFRC	7.734	36.3615	Shrunken, Opaque to translucent	sweet corn
35	CNSiE 17115	RIL	CNFRC	3.539	59.5834	Shrunken, Opaque to translucent	sweet corn
36	CNSiE 17119	RIL	CNFRC	17.763	21.8196	Shrunken, Opaque to translucent	sweet corn
37	CNSiE 17127	RIL	CNFRC	4.613	29.1238	Shrunken, Opaque to translucent	sweet corn
38	CNSiA 18074	RIL	CNFRC	2.475	44.8627	Shrunken, Opaque to translucent	sweet corn
39	CNSiA 18103	RIL	CNFRC	2.367	43.7343	Shrunken, Opaque to translucent	sweet corn
40	CNSiA 18108	RIL	CNFRC	3.133	63.7993	Shrunken, Opaque to translucent	sweet corn
41	CNSiA 18112	RIL	CNFRC	13.937	69.2989	Shrunken, Opaque to translucent	sweet corn
42	CNSiB 18092	RIL	CNFRC	3.294	46.557	Shrunken, Opaque to translucent	sweet corn
43	CNSiB 18069	RIL	CNFRC	2.344	39.9806	Shrunken, Opaque to translucent	sweet corn
44	CNSiB 18135	RIL	CNFRC	2.696	59.7037	Shrunken, Opaque to translucent	sweet corn
45	CNSiB 18144	RIL	CNFRC	2.775	42.5156	Shrunken, Opaque to translucent	sweet corn
46	Clei 0838G	RIL	CNFRC	2.755	29.7168	Shrunken, Opaque to translucent	sweet corn
47	Clei 0856S	RIL	CNFRC	2.385	55.2608	Shrunken, Opaque to translucent	sweet corn
48	D 2018	Inbred	CNFRC	11.973	46.4264	Shrunken, Opaque to translucent	sweet corn
49	M2018	Inbred	CNFRC	3.461	57.0712	Shrunken, Opaque to translucent	sweet corn
50	M 80	Inbred	CNFRC	10.347	5.03892	Opaque	waxy corn
51	WTNGHB 003	RIL	CNFRC	3.345	11.0624	Opaque	waxy corn
52	WPK 008	RIL	CNFRC	3.595	4.60281	Opaque	waxy corn
53	WSJ 003	RIL	CNFRC	2.788	6.46315	Opaque	waxy corn
54	WSL 001	RIL	CNFRC	5.082	8.41518	Opaque	waxy corn
55	WPK 018	RIL	CNFRC	5.624	7.63495	Opaque	waxy corn
56	WPK 034	RIL	CNFRC	3.286	4.2	Opaque	waxy corn
57	WPK 031	RIL	CNFRC	3.547	9.56261	Opaque	waxy corn
58	WKRA 06	RIL	CNFRC	3.713	10.8559	Opaque	waxy corn
59	KKCW 02	RIL	CNFRC	3.8	7.23441	Opaque	waxy corn
60	YNB 01	RIL	CNFRC	3.775	6.82255	Opaque	waxy corn
61	TWA 02	RIL	CNFRC	8.007	4.52351	Opaque	waxy corn
62	WALB 003	RIL	CNFRC	2.717	7.90984	Opaque	waxy corn
63	WEWS 003	RIL	CNFRC	15.068	6.12839	Opaque	waxy corn
64	WAGWX 001	RIL	CNFRC	7.424	4.76749	Opaque	waxy corn
65	WKNN 016	RIL	CNFRC	7.731	12.0842	Opaque	waxy corn
66	CNS 66	Inbred	CNFRC	13.513	32.3101	Shrunken, Opaque to translucent	sweet corn
67	CNS 75	Inbred	CNFRC	2.856	43.9444	Shrunken, Opaque to translucent	sweet corn
68	2A-3	RIL	KKU	3.277	5.50128	Opaque	waxy corn
69	2A-4-1	RIL	KKU	4.5	10.9552	Opaque	waxy corn
70	2A-4-2	RIL	KKU	3.895	7.57281	Opaque	waxy corn
71	8A-3	RIL	KKU	5.649	8.71674	Opaque	waxy corn
72	8A-4	RIL	KKU	4.736	13.5146	Opaque	waxy corn
73	12A-1	RIL	KKU	17.461	11.1198	Opaque	waxy corn
74	12A-2	RIL	KKU	5.365	6.23973	Opaque	waxy corn
75	12A-4	RIL	KKU	3.702	9.83022	Opaque	waxy corn
76	12C-1	RIL	KKU	2.703	5.90249	Opaque	waxy corn
77	12C-2	RIL	KKU	2.941	7.5598	Opaque	waxy corn
78	12C-3	RIL	KKU	2.998	11.1035	Opaque	waxy corn
79	12C-4	RIL	KKU	3.437	6.04555	Opaque	waxy corn
80	12C-5	RIL	KKU	3.203	4.98033	Opaque	waxy corn
81	12C-10	RIL	KKU	3.004	6.07249	Opaque	waxy corn
82	12C-14	RIL	KKU	4.658	4.63599	Opaque	waxy corn
83	12C-15	RIL	KKU	6.537	9.12719	Opaque	waxy corn
84	13A-1	RIL	KKU	5.15	16.2561	Opaque	waxy corn
85	13A-2	RIL	KKU	3.857	10.173	Opaque	waxy corn
86	13A-5	RIL	KKU	3.71	12.2259	Opaque	waxy corn
87	13A-8	RIL	KKU	4.333	12.5376	Opaque	waxy corn
88	99A-1	RIL	KKU	3.378	5.30584	Opaque	waxy corn
89	99A-2	RIL	KKU	3.896	4.97804	Opaque	waxy corn
90	99A-3	RIL	KKU	15.726	4.15455	Opaque	waxy corn
91	99A-4	RIL	KKU	2.885	10.2263	Opaque	waxy corn
92	99A-5	RIL	KKU	16.221	11.6558	Opaque	waxy corn
93	Kv/Mon3-4	RIL	KKU	17.94	4.59825	Opaque	waxy corn
94	Y.18White-3	RIL	KKU	14.601	7.8474	Opaque	waxy corn
95	Y.18White-6	RIL	KKU	9.701	8.27828	Opaque	waxy corn
96	C.13-1White-1	RIL	KKU	11.769	10.3835	Opaque	waxy corn
97	C.13-1White-3	RIL	KKU	12.308	4.46098	Opaque	waxy corn
98	H-No.2Purple-2	RIL	KKU	12.198	6.96128	Opaque	waxy corn
99	Waxy11-2	RIL	KKU	13.696	11.6871	Opaque	waxy corn
100	Tein1-1	RIL	KKU	14.15	4.11398	Opaque	waxy corn
101	Tein1-2	RIL	KKU	15.461	7.49662	Opaque	waxy corn
102	Tein1-3	RIL	KKU	14.748	7.66034	Opaque	waxy corn
103	Tein1-4	RIL	KKU	13.658	4.78304	Opaque	waxy corn
104	Tein1-5	RIL	KKU	18.393	10.5579	Opaque	waxy corn
105	Tein1-6	RIL	KKU	17.039	5.73695	Opaque	waxy corn
106	Tein1-7	RIL	KKU	16.771	4.26155	Opaque	waxy corn
107	Tein1-8	RIL	KKU	16.472	4.68588	Opaque	waxy corn
108	Tein5-1	RIL	KKU	16.981	3.77205	Opaque	waxy corn
109	Tein5-2	RIL	KKU	10.377	4.65916	Opaque	waxy corn
110	Tein5-4	RIL	KKU	17.99	4.02763	Opaque	waxy corn
111	Tein5-5	RIL	KKU	17.76	5.71457	Opaque	waxy corn
112	Tein5-7	RIL	KKU	18.05	6.86815	Opaque	waxy corn
113	TB/KND//IDL-1	RIL	KKU	7.182	5.72657	Opaque	waxy corn
114	TB/KND//IDL-3	RIL	KKU	12.211	7.48398	Opaque	waxy corn
115	NSX/DKA/IDL-3	RIL	KKU	7.862	3.46818	Opaque	waxy corn
116	S6248/TB/KND//PF-1	RIL	KKU	4.927	6.02914	Opaque	waxy corn
117	S6248/TB/KND//PF-3	RIL	KKU	3.81	7.53125	Opaque	waxy corn
118	DNRP-1	RIL	KKU	15.561	4.4916	Opaque	waxy corn
119	DNRP-2	RIL	KKU	12.537	5.68967	Opaque	waxy corn
120	DNRP-3	RIL	KKU	9.479	10.05	Opaque	waxy corn
121	DNRY-1	RIL	KKU	8.515	11.1934	Opaque	waxy corn
122	DNRY-2	RIL	KKU	13.941	7.25287	Opaque	waxy corn
123	DNRW-1	RIL	KKU	9.922	9.43867	Opaque	waxy corn
124	DNRW-2	RIL	KKU	8.456	10.3905	Opaque	waxy corn
125	DNRW-3	RIL	KKU	8.005	5.46041	Opaque	waxy corn
126	DNRW-4	RIL	KKU	15.661	5.25322	Opaque	waxy corn
127	DNRW-5	RIL	KKU	11.185	12.657	Opaque	waxy corn
128	DNRW-6	RIL	KKU	10.571	8.67345	Opaque	waxy corn
129	DNRW-7	RIL	KKU	7.238	4.728	Opaque	waxy corn
130	DNRW-8	RIL	KKU	11.169	10.0934	Opaque	waxy corn
131	DRP-1	RIL	KKU	12.546	6.35977	Opaque	waxy corn
132	DRP-2	RIL	KKU	16.917	7.4669	Opaque	waxy corn
133	DRP-3	RIL	KKU	16.598	5.88442	Opaque	waxy corn
134	DRP-4	RIL	KKU	19.809	11.2216	Opaque	waxy corn
135	DRP-5	RIL	KKU	9.59	10.5945	Opaque	waxy corn
136	DRP-6	RIL	KKU	17.781	4.21326	Opaque	waxy corn
137	DRP-7	RIL	KKU	9.491	4.40367	Opaque	waxy corn
138	DRP-8	RIL	KKU	12.408	4.49164	Opaque	waxy corn
139	DRP-9	RIL	KKU	18.181	11.2697	Opaque	waxy corn
140	DRP-10	RIL	KKU	6.391	14.684	Opaque	waxy corn
141	DRP-11	RIL	KKU	8.294	4.1898	Opaque	waxy corn
142	DRP-12	RIL	KKU	13.211	5.22896	Opaque	waxy corn
143	DRP-13	RIL	KKU	8.458	4.52324	Opaque	waxy corn
144	DRP-14	RIL	KKU	11.802	5.63742	Opaque	waxy corn
145	DRP-15	RIL	KKU	16.111	4.03453	Opaque	waxy corn
146	DRP-16	RIL	KKU	10.887	3.99243	Opaque	waxy corn
147	DRP-17	RIL	KKU	16.796	6.87555	Opaque	waxy corn
148	DRP-18	RIL	KKU	17.796	10.1076	Opaque	waxy corn
149	DRP-19	RIL	KKU	19.411	4.90505	Opaque	waxy corn
150	DRP-20	RIL	KKU	18.77	5.69684	Opaque	waxy corn
151	DRY-1	RIL	KKU	8.342	13.368	Opaque	waxy corn
152	DRY-2	RIL	KKU	14.423	8.54338	Opaque	waxy corn
153	DRY-3	RIL	KKU	10.082	5.03582	Opaque	waxy corn
154	DRY-4	RIL	KKU	11.96	9.86806	Opaque	waxy corn
155	DRY-5	RIL	KKU	10.342	10.2163	Opaque	waxy corn
156	DRY-6	RIL	KKU	11.393	5.54358	Opaque	waxy corn
157	DRY-7	RIL	KKU	8.936	7.08548	Opaque	waxy corn
158	DRY-8	RIL	KKU	11.755	7.69431	Opaque	waxy corn
159	DRY-9	RIL	KKU	11.584	4.74081	Opaque	waxy corn
160	DRW-1	RIL	KKU	10.872	7.79263	Opaque	waxy corn
161	DRW-2	RIL	KKU	9.536	18.595	Opaque	waxy corn
162	DRW-3	RIL	KKU	11.512	4.47335	Opaque	waxy corn
163	DRW-4	RIL	KKU	11.15	13.5258	Opaque	waxy corn
164	DRW-5	RIL	KKU	9.884	4.33601	Opaque	waxy corn
165	DRW-6	RIL	KKU	14.441	4.79169	Opaque	waxy corn
166	DRW-7	RIL	KKU	12.64	10.2349	Opaque	waxy corn
167	DRW-8	RIL	KKU	20.5	14.7655	Opaque	waxy corn
168	DRW-9	RIL	KKU	11.509	7.45235	Opaque	waxy corn
169	DRW-10	RIL	KKU	16.064	14.9451	Opaque	waxy corn
170	DRW-11	RIL	KKU	16.267	9.60434	Opaque	waxy corn
171	DRW-12	RIL	KKU	14.852	5.77284	Opaque	waxy corn
172	DRW-13	RIL	KKU	8.011	8.61435	Opaque	waxy corn
173	DRW-14	RIL	KKU	13.1	9.39946	Opaque	waxy corn
174	DRW-15	RIL	KKU	18.27	4.42549	Opaque	waxy corn
175	DRW-16	RIL	KKU	10.85	9.42011	Opaque	waxy corn
176	DRW-17	RIL	KKU	10.012	5.94496	Opaque	waxy corn
177	DRW-18	RIL	KKU	10.092	16.4837	Opaque	waxy corn
178	DRW-19	RIL	KKU	12.066	6.27446	Opaque	waxy corn
179	DRW-20	RIL	KKU	14.025	7.73946	Opaque	waxy corn
180	DRW-21	RIL	KKU	7.952	10.1439	Opaque	waxy corn
181	DRW-22	RIL	KKU	12.562	5.80757	Opaque	waxy corn
182	DRW-23	RIL	KKU	15.854	4.99226	Opaque	waxy corn
183	DRW-24	RIL	KKU	9.967	9.70799	Opaque	waxy corn
184	DRW-25	RIL	KKU	13.88	7.40239	Opaque	waxy corn
185	DRW-26	RIL	KKU	8.827	14.1238	Opaque	waxy corn
186	DRW-27	RIL	KKU	13.212	16.5287	Opaque	waxy corn
187	DRW-28	RIL	KKU	16.923	7.0769	Opaque	waxy corn
188	DRW-29	RIL	KKU	6.818	13.9456	Opaque	waxy corn
189	LP-1	RIL	KKU	20.536	4.71299	Opaque	waxy corn
190	LP-2	RIL	KKU	19.326	5.99443	Opaque	waxy corn
191	LW-1	RIL	KKU	17.606	6.69416	Opaque	waxy corn
192	LW-3	RIL	KKU	19.353	6.97353	Opaque	waxy corn
193	RLP-1	RIL	KKU	6.07	6.08625	Opaque	waxy corn
194	RLP-2	RIL	KKU	10.495	6.71496	Opaque	waxy corn
195	RLP-3	RIL	KKU	12.147	6.67515	Opaque	waxy corn
196	RLW-1	RIL	KKU	12.464	4.0386	Opaque	waxy corn
197	RLW-2	RIL	KKU	12.425	4.06342	Opaque	waxy corn
198	RLW-5	RIL	KKU	19.581	4.75541	Opaque	waxy corn
199	RLW-8	RIL	KKU	18.744	4.87481	Opaque	waxy corn
200	RLW-10	RIL	KKU	14.27	5.89349	Opaque	waxy corn
201	RLY-1	RIL	KKU	9.318	5.63919	Opaque	waxy corn
202	RLY-2	RIL	KKU	9.299	6.90924	Opaque	waxy corn
203	TSC/H3-1	RIL	KKU	2.409	46.6136	Shrunken, Opaque to translucent	sweet corn
204	TSC/H3-7	RIL	KKU	9.53	66.5235	Shrunken, Opaque to translucent	sweet corn
205	TSC/Su75-1	RIL	KKU	2.616	42.0568	Shrunken, Opaque to translucent	sweet corn
206	TSC/Su75-2	RIL	KKU	2.716	34.963	Shrunken, Opaque to translucent	sweet corn
207	TSC/Su75-3	RIL	KKU	2.539	38.2004	Shrunken, Opaque to translucent	sweet corn
208	TSC/Su75-4	RIL	KKU	2.314	60.3229	Shrunken, Opaque to translucent	sweet corn
209	TSC/Su75-5	RIL	KKU	12.348	32.3364	Shrunken, Opaque to translucent	sweet corn
210	TSC/Su75-6	RIL	KKU	3.842	29.8896	Shrunken, Opaque to translucent	sweet corn
211	TSC/Su75-7	RIL	KKU	4.187	40.5437	Shrunken, Opaque to translucent	sweet corn
212	TSC/Su75-8	RIL	KKU	6.723	37.2694	Shrunken, Opaque to translucent	sweet corn
213	TSC/Su75-12	RIL	KKU	3.35	34.2371	Shrunken, Opaque to translucent	sweet corn
214	TSC/Su75-13	RIL	KKU	5.322	39.7444	Shrunken, Opaque to translucent	sweet corn
215	101LTSC4	RIL	KKU	10.084	35.9871	Shrunken, Opaque to tarnished	sweet corn
216	101LTSC10	RIL	KKU	6.315	45.3419	Shrunken, Opaque to tarnished	sweet corn
217	Pop Sh2	RIL	KKU	20.448	42.5517	Shrunken, Opaque to translucent	sweet corn
218	Pop. Bt	RIL	KKU	16.13	66.6201	Shrunken, Opaque to tarnished	sweet corn
219	P4554/Su bu-1	RIL	KKU	6.727	30.9879	Shrunken, Opaque to translucent	sweet corn
220	KV81/SSW-4	RIL	KKU	3.134	27.8194	Shrunken, Opaque to translucent	sweet corn
221	s6248/x2573-1	RIL	KKU	14.357	55.2654	Shrunken, Opaque to translucent	sweet corn
222	C.13-1L	RIL	KKU	9.372	23.0638	Shrunken, Opaque to tarnished	sweet corn
223	ws21	RIL	KKU	10.617	46.4532	Shrunken, Opaque to translucent	sweet corn
224	ws26	RIL	KKU	10.901	49.4878	Shrunken, Opaque to translucent	sweet corn
225	ws41	RIL	KKU	4.272	24.8116	Shrunken, Opaque to translucent	sweet corn
226	ws160	RIL	KKU	10.583	47.0722	Shrunken, Opaque to translucent	sweet corn
227	ws181	RIL	KKU	9.964	58.9082	Shrunken, Opaque to translucent	sweet corn
228	ws186	RIL	KKU	6.144	27.7146	Shrunken, Opaque to translucent	sweet corn
229	ws243	RIL	KKU	10.498	22.2452	Shrunken, Opaque to translucent	sweet corn
230	Sweet5-5	RIL	KKU	19.162	61.2177	Shrunken, Opaque to translucent	sweet corn
231	Sweet5-6	RIL	KKU	16.519	36.6108	Shrunken, Opaque to translucent	sweet corn
232	Sweet5-7	RIL	KKU	9.605	59.6255	Shrunken, Opaque to translucent	sweet corn
233	W54/Delectale	RIL	KKU	16.366	36.4167	Shrunken, Opaque to translucent	sweet corn
234	W54/DB	RIL	KKU	14.99	30.826	Shrunken, Opaque to translucent	sweet corn
235	216Y	Inbred	KKU	6.367	9.23828	Opaque	waxy corn
236	241W	Inbred	KKU	8.349	8.59773	Opaque	waxy corn
237	209W	Inbred	KKU	2.688	4.37027	Opaque	waxy corn
238	KK2W	Inbred	KKU	13.712	26.0733	Shrunken, Opaque to translucent	sweet corn
239	KK5Y	Inbred	KKU	8.88	36.2869	Shrunken, Opaque to translucent	sweet corn
240	KK8W	Inbred	KKU	14.751	45.5016	Shrunken, Opaque to translucent	sweet corn
241	KK8Y	Inbred	KKU	12.554	25.4993	Shrunken, Opaque to translucent	sweet corn
242	KV81	Inbred	KKU	7.424	6.9666	Opaque	waxy corn
243	KNM102	Inbred	KKU	3.168	8.33483	Opaque	waxy corn
244	SEY37	Inbred	KKU	4.658	53.2674	Shrunken, Opaque to translucent	sweet corn
245	101LAB	Inbred	KKU	8.349	10.1616	Opaque	waxy corn
246	101LBW	Inbred	KKU	10.648	11.8388	Opaque	waxy corn
247	TB1	Inbred	KKU	4.664	4.56318	Opaque	waxy corn
248	TB3	Inbred	KKU	6.105	5.19278	Opaque	waxy corn
249	TC1	Inbred	KKU	5.294	6.02945	Opaque	waxy corn
250	TW1	Inbred	KKU	7.863	10.8178	Opaque	waxy corn
