# Supplementary material for: Identification of Gene Associated with Sweetness in Corn (Zea mays L.) by Genome-Wide Association Study (GWAS) and Development of a Functional SNP Marker for Predicting Sweet Corn
Source: Plants (Basel). 2021 Jun 18;10(6):1239. doi: 10.3390/plants10061239 (PMC8235792; doi:10.3390/plants10061239)
Supplement: Supplementary file 1 [file plants-10-01239-s001.zip › Table S2 - List of 81 corn lines for marker validation.xlsx]

## Sheet: Sheet1
Table S2. List of 81 inbreds, recombinant inbred lines and commercial hybrids used for marker validation
No.	Sample name	Corn type	Inbred/line/hybrid	Source
1	TSC/SU75 (sh2)	sweet	Inbred	KKU
2	Xtra-Tender 2171 (sh2)	sweet	Hybrid	USA
3	Bicolor Mini Corn (sh2)	sweet	Hybrid	Commercial USA
4	Sweet Corn (sh2)	sweet	Hybrid	Commercial USA
5	Hibrix3 (sh2)	sweet	Hybrid	Pacifiec Seed THA
6	Sweet7 (sh2)	sweet	RIL	KKU
7	SS3778R (sh2)	sweet	Hybrid	USA
8	Allure (sh2se+)	sweet	Hybrid	USA
9	Montauk (sh2se+)	sweet	Hybrid	USA
10	Sweetness (sh2se+)	sweet	Hybrid	USA
11	101L.bt	sweet	Inbred	KKU
12	Pop. su	sweet	RIL	KKU
13	Pop. se	sweet	RIL	KKU
14	H.NO.2	waxy	Inbred	China
15	Orange	waxy	Inbred	KKU
16	Tuxpeno-1	waxy	Inbred	Suwan Farm
17	TB3	waxy	Inbred	KKU
18	TB1	waxy	Inbred	KKU
19	TW	waxy	Inbred	KKU
20	KV	waxy	Inbred	KKU
21	Y.18	waxy	Inbred	China
22	KNM	waxy	Inbred	KKU
23	Ki44	field corn	Inbred	Suwan Farm
24	Pop. Wx-4	waxy	RIL	KKU
25	Waxy1-4	waxy	RIL	KKU
26	Tein1-10	waxy	RIL	KKU
27	PF/AB-2	waxy	RIL	KKU
28	WSTS/IDL/KND	waxy	RIL	KKU
29	LW-2	waxy	RIL	KKU
30	RLP-4	waxy	RIL	KKU
31	RLW-3	waxy	RIL	KKU
32	RLW-4	waxy	RIL	KKU
33	RLW-6	waxy	RIL	KKU
34	RLW-7	waxy	RIL	KKU
35	RLW-9	waxy	RIL	KKU
36	RLY-3	waxy	RIL	KKU
37	Sein Gote To	waxy	Inbred	Myanmar
38	Kyout Nyin Pyaung	waxy	Inbred	Myanmar
39	Kayar Pyaung	waxy	Inbred	Myanmar
40	Thi Hmwe	waxy	Inbred	Myanmar
41	Khayan	waxy	Inbred	Myanmar
42	Thayat Thamain	waxy	Inbred	Myanmar
43	Ngapyar Gyi	waxy	Inbred	Myanmar
44	Wxx 12 X 10	waxy	Inbred	Myanmar
45	Wxx 11X10 X Wxx 10X8	waxy	Inbred	Myanmar
46	Wxx 11X 10	waxy	Inbred	Myanmar
47	Inlay Ni	waxy	Inbred	Myanmar
48	ABI-15-013	field corn	Inbred	Myanmar
49	ABI-18-004	field corn	Inbred	Myanmar
50	ABI-18-015	field corn	Inbred	Myanmar
51	ABI-18-037	field corn	Inbred	Myanmar
52	ABI-18-039	field corn	Inbred	Myanmar
53	ABI-18-002	field corn	Inbred	Myanmar
54	Samsee Chia Tai 1	waxy	hybrid	Commercial THA
55	Sam Lee	waxy	hybrid	Commercial THA
56	Pad Thew	waxy	hybrid	Commercial THA
57	Corn	waxy	hybrid	Commercial THA
58	White Green	waxy	hybrid	Commercial THA
59	SUPREME	waxy	hybrid	Commercial THA
60	Neaw Maung Wan 09	waxy	hybrid	Commercial THA
61	Nei452004	field corn	Inbred	Takfa
62	Nei452026	field corn	Inbred	Takfa
63	Nei9008	field corn	Inbred	Takfa
64	Nei542010	field corn	Inbred	Takfa
65	Nei582016	field corn	Inbred	Takfa
66	Nei541017	field corn	Inbred	Takfa
67	Nei452006	field corn	Inbred	Takfa
68	Nei9202 (T)	field corn	Inbred	Takfa
69	Takfa 1	field corn	Inbred	Takfa
70	Nei452029	field corn	Inbred	Takfa
71	Takfa 3	field corn	Inbred	Takfa
72	Nei502007	field corn	Inbred	Takfa
73	Nei452029	field corn	Inbred	Takfa
74	Nei462013	field corn	Inbred	Takfa
75	Nei532005	field corn	Inbred	Takfa
76	Nei502002	field corn	Inbred	Takfa
77	Nei582042	field corn	Inbred	Takfa
78	Nei452015 (Takfa 3)	field corn	Inbred	Takfa
79	Nei452006 (Takfa 4)	field corn	Inbred	Takfa
80	Nei462013 (Takfa 7)	field corn	Inbred	Takfa
81	Nei452009 (Takfa 5)	field corn	Inbred	Takfa
