# Supplementary material for: Identification of Gene Associated with Sweetness in Corn (Zea mays L.) by Genome-Wide Association Study (GWAS) and Development of a Functional SNP Marker for Predicting Sweet Corn
Source: Plants (Basel). 2021 Jun 18;10(6):1239. doi: 10.3390/plants10061239 (PMC8235792; doi:10.3390/plants10061239)
Supplement: Supplementary file 1 [file plants-10-01239-s001.zip › Table S3 - List of associated SNP annotation_final.xlsx]

## Sheet: Sheet1
Table S3. Annotation of genes located within the same LD block as the associated SNPs.
SNP	Chr	Position (B73 v.4)	-log10(p)	MAF	R2	LD block (bp)	Gene ID	Start	End	Gene Name	Description
AX-91593662	3	218476619	7.99	0.33	0.17	75000	Zm00001d044078	218444381	218444605		Little protein 1
							Zm00001d044079	218445281	218446520		Tat pathway signal sequence family protein
							Zm00001d044080	218453462	218454025		OLE-5
							Zm00001d044081	218481322	218485402	Homeobox-transcription factor 46	Homeobox-leucine zipper protein ATHB-4
							Zm00001d000706	218486987	218487677
							ENSRNA049472175	218501779	218501860	snoZ199	Small nucleolar RNA Z199
AX-91593878	3	219463930	7.42	0.31	0.16	75000	Zm00001d044107	219453611	219454543	MYB-transcription factor 53	R2R3MYB-domain protein
AX-91849634	3	220057126	13.81	0.333	0.18	75000	Zm00001d044129	219979958	219989574	Zm00001d044129 (Shrunken2)	Glucose-1-phosphate adenylyltransferase large subunit 1%252C chloroplastic/amyloplastic
							Zm00001d044130	220029482	220030389		50S ribosomal protein L31
							Zm00001d044131	220045091	220045837
							Zm00001d044132	220048348	220051924		Aspartic proteinase A1
							Zm00001d044133	220055214	220062437
							Zm00001d044134	220061638	220062435
							Zm00001d044135	220066585	220067204		Alanine aminotransferase 2 mitochondrial
							Zm00001d044136	220098352	220104557		Glycerol-3-phosphate acyltransferase 1
							ENSRNA049473965	220124430	220124531	snoZ119	Small nucleolar RNA Z119
							ENSRNA049473978	220124706	220124801	snoZ119	Small nucleolar RNA Z119
AX-90850969	3	220099694	9.74	0.34	0.17	75000	Zm00001d044133	220055214	220062437
							Zm00001d044134	220061638	220062435
							Zm00001d044135	220066585	220067204		Alanine aminotransferase 2 mitochondrial
							Zm00001d044136	220098352	220104557		Glycerol-3-phosphate acyltransferase 1
							ENSRNA049473965	220124430	220124531	snoZ119	Small nucleolar RNA Z119
							ENSRNA049473978	220124706	220124801	snoZ119	Small nucleolar RNA Z119
AX-90866628	4	42950506	8.1	0.48	0.16	85000	Zm00001d049748	42988937	42990611		Ras guanine nucleotide exchange factor K
AX-90877243	4	83464190	7.5	0.05	0.11	85000	Zm00001d050358	83464018	83466332
							Zm00001d050359	83491443	83500858		F-box protein SKIP28
AX-91612113	4	83465341	8.37	0.055	0.16	85000	Zm00001d050357	83387415	83392828		THO complex subunit 4C
							Zm00001d050358	83464018	83466332
							Zm00001d050359	83491443	83500858		F-box protein SKIP28
AX-91346854	4	83501441	7.37	0.07	0.11	85000	Zm00001d050358	83464018	83466332
							Zm00001d050359	83491443	83500858		F-box protein SKIP28
AX-91617781	4	115510176	7.46	0.05	0.17	85000	Zm00001d050689	115493076	115494365		U-box domain-containing protein 29
							Zm00001d050690	115495849	115496802
AX-90975122	5	213164020	7.26	0.069	0.1	56000	Zm00001d018049	213151971	213160764		HVA22-like protein a
							Zm00001d018050	213161649	213165885	AP2-EREBP-transcription factor 187	AP2-like ethylene-responsive transcription factor AIL1
							Zm00001d018051	213219441	213220187
AX-91411958	7	159043703	7.34	0.09	0.09	60000	Zm00001d001263	159031069	159033067
							Zm00001d021647	159034934	159046986		ABC transporter G family member 34
							Zm00001d021648	159047515	159052509
							Zm00001d021649	159062265	159067338		Ras-related small GTP-binding family protein
AX-91740905	7	159053605	7.34	0.092	0.11	60000	Zm00001d001263	159031069	159033067
							Zm00001d021647	159034934	159046986		ABC transporter G family member 34
							Zm00001d021648	159047515	159052509
							Zm00001d021649	159062265	159067338		Ras-related small GTP-binding family protein
							Zm00001d021651	159107708	159108658
