# Supplementary material for: Identification of Gene Associated with Sweetness in Corn (Zea mays L.) by Genome-Wide Association Study (GWAS) and Development of a Functional SNP Marker for Predicting Sweet Corn
Source: Plants (Basel). 2021 Jun 18;10(6):1239. doi: 10.3390/plants10061239 (PMC8235792; doi:10.3390/plants10061239)
Supplement: Supplementary file 1 [file plants-10-01239-s001.zip › Table S4 - a set of 43 maize lines using a MassARRAY┬« platform .xlsx]

## Sheet: TableS3
Table S4. List of maize samples used to validate the MassArray markers. Information on types and sourcres of the maize samples and the genotypes of each marker are provided.
No.	Corn type	Inbred/line/hybrid	Source	Sample name	AX_90540251	SH2_04_rs129520792	SH2_12_rs828195672	SH2_14_rs831139887	SH2_15_rs802264642	AX_91593984	AX_91593975	SH2_18_rs844805326	SH2_20_rs806747225	SH2_28_rs277282298
1	sweet	RIL	CNFRC	CNSiA 17005	GG	nd	CC	CC	CC	TT	AA	TT	CC	CC
2	sweet	RIL	CNFRC	CNSiA 17016	GG	nd	CC	CC	CC	TT	AA	TT	CC	CC
3	sweet	RIL	CNFRC	CNSiA 17040	GG	nd	CC	CC	CC	TT	AA	TT	CC	CC
4	sweet	RIL	CNFRC	CNSiA 17074	GG	nd	CC	CC	CC	TT	AA	TT	CC	CC
5	sweet	RIL	CNFRC	CNSiA 17096	GG	nd	CC	CC	CC	TT	AA	TT	CC	CC
6	sweet	RIL	CNFRC	CNSiA 17164	GG	nd	CC	CC	CC	TT	AA	TT	CC	CC
7	sweet	RIL	CNFRC	CNSiA 17241	GG	AA	CC	CC	CC	TT	AA	TT	CC	CC
8	sweet	RIL	CNFRC	CNSiA 17242	GG	nd	CC	CC	CC	TT	AA	TT	CC	CC
9	sweet	RIL	CNFRC	CNSiA 17244	GG	nd	CC	CC	CC	TT	AA	TT	CC	CC
10	sweet	RIL	CNFRC	CNSiB 17075	GG	nd	CC	CC	CC	TT	AA	TT	CC	CC
11	sweet	RIL	CNFRC	CNSiB 17088	GG	nd	CC	CC	CC	TT	AA	TT	CC	CC
12	sweet	RIL	CNFRC	CNSiB 17173	GG	nd	CC	CC	CC	TT	AA	TT	CC	CC
13	sweet	RIL	CNFRC	CNSiB 17220	GG	nd	CC	CC	CC	TT	AA	TT	CC	CC
14	sweet	RIL	CNFRC	CNSiB 17248	GG	nd	CC	CC	CC	TT	AA	TT	CC	CC
15	sweet	RIL	CNFRC	CNSiE 17028	GG	AA	CC	CC	CC	TT	AA	TT	CC	CC
16	sweet	RIL	CNFRC	CNSiE 17031	GG	AA	CC	CC	CC	TT	AA	TT	CC	CC
17	sweet	RIL	CNFRC	CNSiE 17048	GG	AA	CC	CC	CC	TT	AA	TT	CC	CC
18	sweet	RIL	CNFRC	CNSiE 17052	GG	AA	CC	CC	CC	TT	AA	TT	CC	CC
19	sweet	RIL	CNFRC	CNSiE 17057	GG	AA	CC	CC	CC	TT	AA	TT	CC	CC
20	sweet	RIL	CNFRC	CNSiE 17074	GG	AA	CC	CC	CC	TT	AA	TT	CC	CC
21	sweet	RIL	CNFRC	CNSiE 17085	GG	AA	CC	CC	CC	TT	AA	TT	CC	CC
22	sweet	RIL	CNFRC	CNSiE 17094	GG	AA	CC	CC	CC	TT	AA	TT	CC	CC
23	sweet	RIL	CNFRC	CNSiE 17100	GG	AA	CC	CC	CC	TT	AA	TT	CC	CC
24	sweet	RIL	CNFRC	CNSiE 17115	GG	AA	CC	CC	CC	TT	AA	TT	CC	CC
25	sweet	RIL	CNFRC	CNSiE 17119	GG	AA	CC	CC	CC	TT	AA	TT	CC	CC
26	sweet	RIL	CNFRC	CNSiE 17127	GG	AA	CC	CC	CC	TT	AA	TT	CC	CC
27	sweet	RIL	CNFRC	CNSiA 18040	GG	AA	CC	CC	CC	TT	AA	TT	CC	CC
28	sweet	RIL	CNFRC	CNSiA 18074	GG	AA	CC	CC	CC	TT	AA	TT	CC	CC
29	sweet	RIL	CNFRC	CNSiA 18103	GG	AA	CC	CC	CC	TT	AA	TT	CC	CC
30	sweet	RIL	CNFRC	CNSiA 18108	GG	AA	CC	CC	CC	TT	AA	TT	CC	CC
31	sweet	RIL	CNFRC	CNSiA 18112	GG	AA	CC	CC	CC	TT	AA	TT	CC	CC
32	sweet	RIL	CNFRC	CNSiB 18092	GG	AA	CC	CC	CC	TT	AA	TT	CC	CC
33	sweet	RIL	CNFRC	CNSiB 18069	GG	AA	CC	CC	CC	TT	AA	TT	CC	CC
34	sweet	RIL	CNFRC	CNSiB 18135	GG	AA	CC	CC	CC	TT	AA	TT	CC	CC
35	sweet	RIL	CNFRC	CNSiB 18144	GG	AA	CC	CC	CC	TT	AA	TT	CC	CC
36	sweet	RIL	CNFRC	Clei 0838G	GG	AA	CC	CC	CC	TT	AA	TT	CC	CC
37	sweet	RIL	CNFRC	Clei 0856S	GG	AA	CC	CC	CC	TT	AA	TT	CC	CC
38	sweet	RIL	CNFRC	CNS 66	GG	nd	CC	CC	CC	TT	AA	TT	CC	CC
39	waxy	Inbred	KKU	TB3	GG	nd	CC	CC	CC	nd	AA	CC	CC	CC
40	waxy	Inbred	KKU	TB1	GG	nd	CC	CC	CC	AA	TA	CC	CC	CC
41	waxy	Inbred	KKU	TW	AA	nd	CC	CC	CC	TT	AA	CC	CC	CC
42	waxy	Inbred	KKU	KV	GG	GG	CC	CC	CC	AT	TA	CC	CC	CC
43	waxy	Inbred	KKU	KNM	GG	nd	CC	CC	CC	AA	nd	CC	CC	CC
