# Supplementary material for: Identification of Gene Associated with Sweetness in Corn (Zea mays L.) by Genome-Wide Association Study (GWAS) and Development of a Functional SNP Marker for Predicting Sweet Corn
Source: Plants (Basel). 2021 Jun 18;10(6):1239. doi: 10.3390/plants10061239 (PMC8235792; doi:10.3390/plants10061239)
Supplement: Supplementary file 1 [file plants-10-01239-s001.zip › Table S5 - Marker validation.xlsx]

## Sheet: TableS4
Table S5. List of the MassArray markers designed based on the ten variants in Sh2. Marker details and the R2 values from a single marker analysis validated on the 43 maize lines are provided.
SNP ID	Chr	Position (B73 V.4)	Alelles	Unextended primer (UEP) sequence (5'----3')	UEP mass (Da)	call 1	mass 1 (Da)	call2	mass 2 (Da)	R2	P-value
AX_90540251	3	219980272	G/A	tGTGATCTTGAAGAATGCAA	6180	G	6427.2	A	6507.1	0.181	0.004459
SH2_04_rs129520792	3	219980689	A/G	ccccgGCTTCTTCTTCAGTTTCATAG	7839.1	A	8110.3	G	8126.3	1	< 2.2E-16
SH2_12_rs828195672	3	219983718	C/G	AATTCTTTGAAAAACCAAAGG	6446.2	G	6693.4	C	6733.5	0	0
SH2_14_rs831139887	3	219983940	C/T	gtatcGTGATATCAGCATCGTCCT	7318.8	C	7565.9	T	7645.9	0	0
SH2_15_rs802264642	3	219984110	C/T	CCTGTATTTCTTTAGGATTATTACA	7612	T	7883.2	C	7899.2	0	0
AX_91593984	3	219984862	T/A	cccgACCACTTCGATTATGG	6052.9	A	6324.2	T	6380	0.6728	2.989e-11
AX_91593975	3	219985438	A/T	cccTCAAATAGGGTCATCT	5747.8	T	6019	A	6074.9	0.475	4.49e-07
SH2_18_rs844805326	3	219985637	C/T	gTTGGTGGTAGAGTTGCT	5616.6	T	5887.9	C	5903.9	1	< 2.2E-16
SH2_20_rs806747225	3	219985795	A/G	AGTGCAAACTGCATATCT	5482.6	C	5729.8	T	5809.7	0	0
SH2_28_rs277282298	3	219989285	G/A	ACCACTACCACCAACA	4748.1	C	4995.3	T	5075.2	0	0
