# Supplementary figures and images for: Identification of Gene Associated with Sweetness in Corn (Zea mays L.) by Genome-Wide Association Study (GWAS) and Development of a Functional SNP Marker for Predicting Sweet Corn
Source: MDPI journal article supplement (doi:10.3390/plants10061239), 2021-06-18

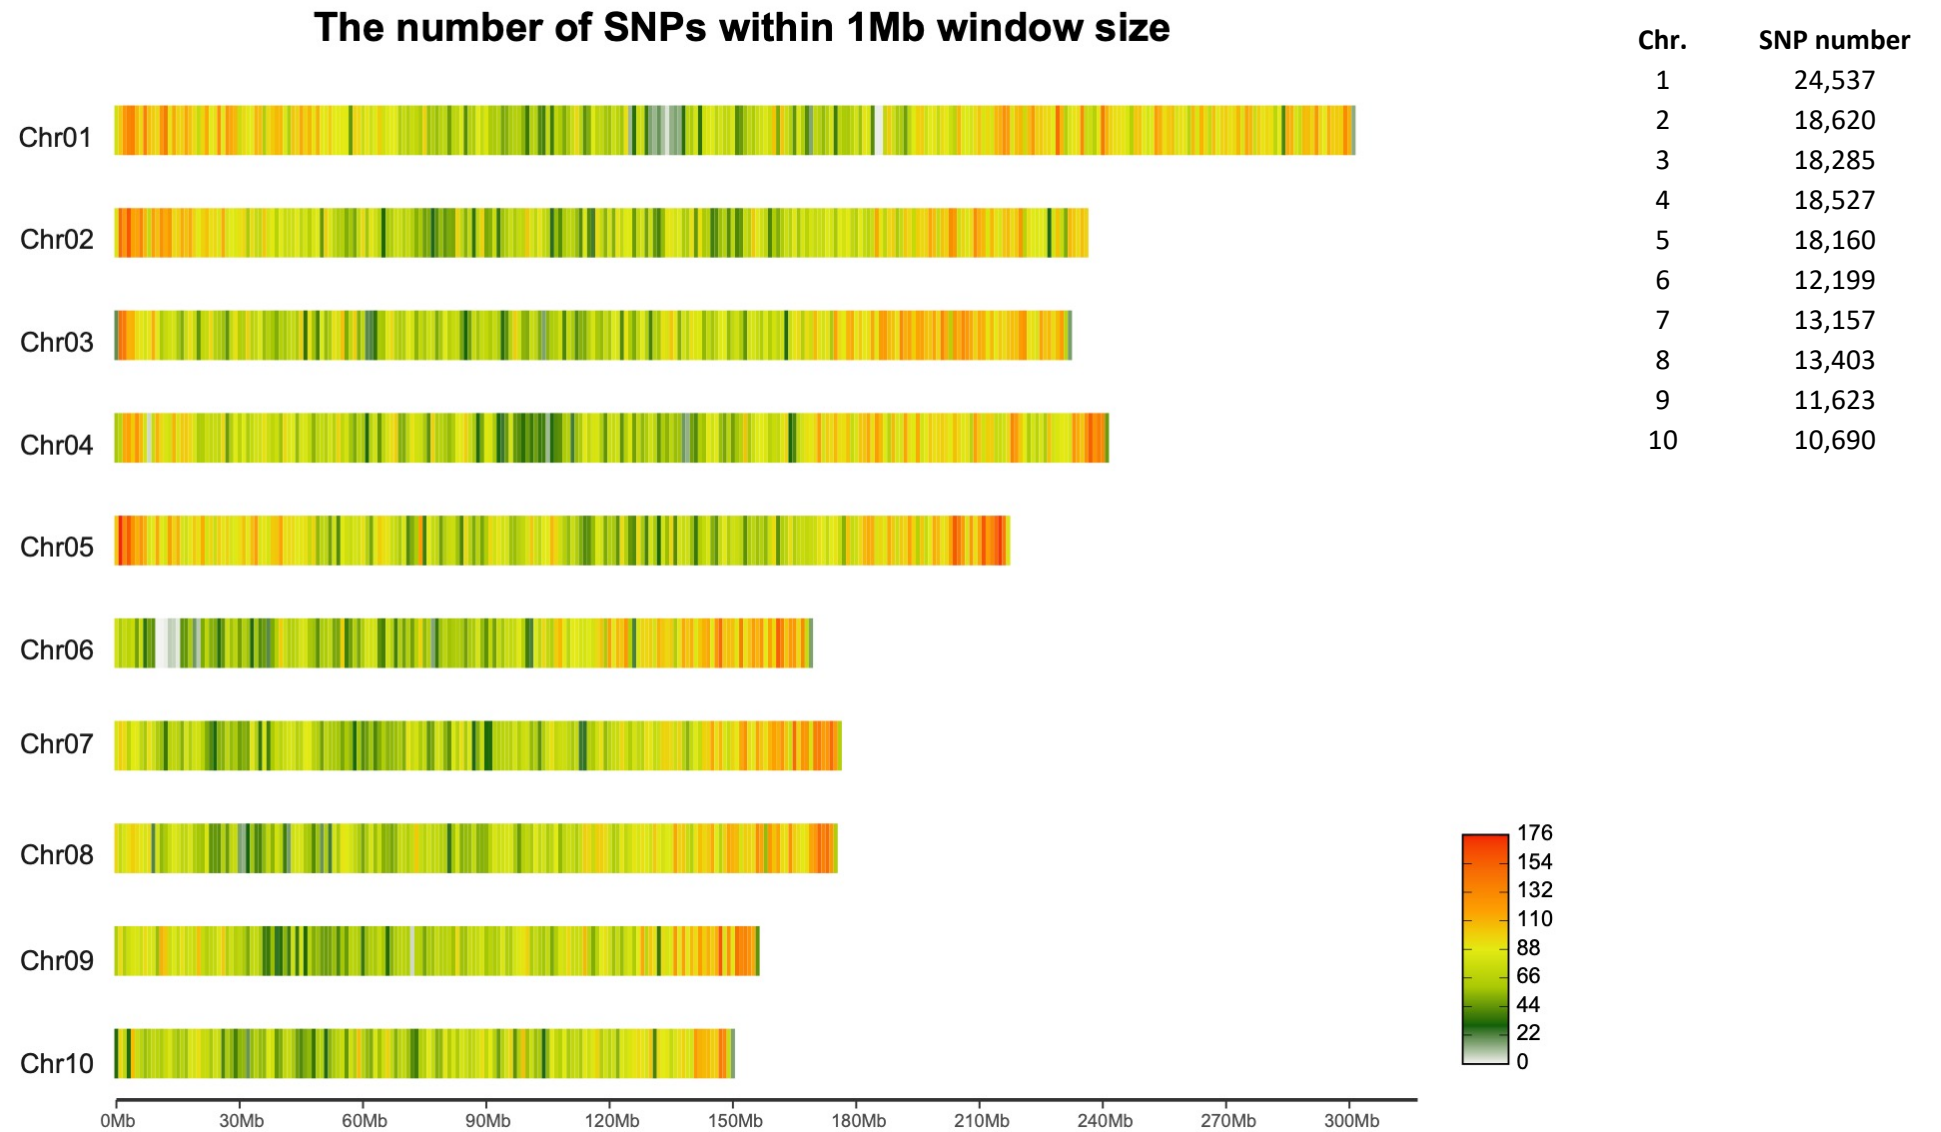

**Figure S3.** Density and distribution of SNPs throughout 10 maize chromosomes

Supplement: s1 [file s1]
